# Supplementary material for: Antioxidant Systematic Alteration Was Responsible for Injuries Inflicted on the Marine Blue Mussel Mytilus edulis Following Strontium Exposure
Source: MDPI journal article supplement (doi:10.3390/antiox13040464), 2024-04-14
Supplement: s1 [file s1]

## Supplementary Material

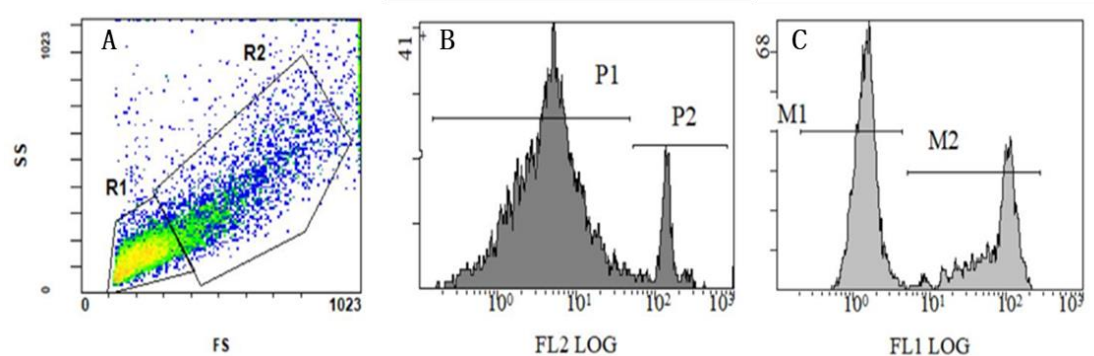

Figure S1 The classification of hemolymph in *M. edulis* by FCM. A: Cluster analysis of hemolymph; B: Mortality analysis of hemolymph, C: Phagocytic capability analysis of hemolymph.

Note: (A) R1: Hyalinocytes, R2: Granulocytes; (B) P1: the viability hemolymph, P2: the mortality hemolymph; (C) M1: Hemolymph phagocytizing no beads; M2: Hemolymph phagocytizing one or more beads.
